# Supplementary material
Source: PubMed Central journal article supplement (PMC4168811)
Supplement: CJP-2014-vol59-September-487-496-eAppendix.pdf [file CJP-2014-vol59-September-487-496-eAppendix.pdf]

Berlim MT, Van den Eynde F. Repetitive transcranial magnetic stimulation over the dorsolateral prefrontal cortex for treating posttraumatic stress disorder: an exploratory meta-analysis of randomized, double-blind and sham-controlled trials. Can J Psychiatry. 2014;59(9):487–496.

## **SUPPLEMENTAL DATA**

### **1. DATABASES SEARCH (1995-2013)**

#### ***1.1 Electronic Databases – Selection***

- MEDLINE: January 1<sup>st</sup>, 1995 - March 12, 2013
- EMBASE: January 1<sup>st</sup>, 1996 - March 12, 2013
- PsycINFO: January 1<sup>st</sup>, 1995 - March 12, 2013
- Cochrane Central Register of Controlled Trials (CENTRAL): January 1<sup>st</sup>, 1995 - March 12, 2013
- SCOPUS: January 1<sup>st</sup>, 1996 - March 12, 2013

#### ***1.2 Electronic Databases – Syntaxes***

##### **1.2.1 MEDLINE (PubMed)**

An advanced search was conducted on 2013/03/12 using the following search syntax:

("transcranial magnetic"[TIAB] OR rTMS[TIAB] OR "magnetic stimulation"[TIAB]) AND (stress\*[TI] OR PTSD[TI] OR trauma\*[TI])

This search retrieved 50 references.

##### **1.2.2 EMBASE (OVID interface)**

An advanced search was conducted on 2013/03/12 using the following search syntax:

(transcranial magnetic.ti,ab. or rtms.ti,ab. or magnetic stimulation.ti,ab.) and (ptsd.ti. or stress\$.ti. or tauma\$.ti.) and (English language and yr="1996-Current")

This search retrieved 32 references.

##### **1.2.3 PsycINFO (OVID interface)**

An advanced search was conducted on 2013/03/12 using the following syntax:

(transcranial magnetic.ti,ab. or rtms.ti,ab. or magnetic stimulation.ti,ab.) and (ptsd.ti. or stress\$.ti. or trauma\$.ti.) and (English language and yr="1995-Current")

This search retrieved 17 references.

#### 1.2.4 CENTRAL

An advanced search was conducted on 2013/03/12 using the following syntax:

("transcranial magnetic" OR rTMS OR "magnetic stimulation") AND (stress\* OR PTSD OR trauma\*), from 1995 to 2013 in Trials

This search retrieved 27 references.

#### 1.2.5 SCOPUS

An advanced search was conducted on 2013/03/12 using the following syntax:

TITLE-ABS-KEY("transcranial magnetic" OR rtms OR "magnetic stimulation")  
AND TITLE(stress\* OR ptsd OR trauma\*) AND (LIMIT-TO(LANGUAGE, "English"))  
AND (LIMIT-TO(PUBYEAR, 1996-2013))

This search retrieved 74 references.

### 1.3 *Excluded Studies and Reasons for Exclusion*

#### 1.3.1 MEDLINE, PsycINFO, EMBASE, CENTRAL, and SCOPUS

Searches on MEDLINE, PsycINFO, EMBASE, CENTRAL, and SCOPUS yielded 98 references (after discarding duplicates). Of these, 4 were included in this meta-analysis; please refer to Table 1 for information on excluded studies.

**Table 1.** MEDLINE, PsycINFO, EMBASE, CENTRAL, and SCOPUS: reasons for exclusion.

| <b>REASON FOR EXCLUSION</b>            |  | <b>n</b> |
|----------------------------------------|--|----------|
| <b>No Primary Data</b>                 |  |          |
| Review                                 |  | 14       |
| Comment/editorial/erratum/reply/letter |  | 2        |
| Trial registration                     |  | 1        |

| With Primary Data                                                                                                     |           |
|-----------------------------------------------------------------------------------------------------------------------|-----------|
| Case report                                                                                                           | 4         |
| Open label study                                                                                                      | 2         |
| Non-treatment rTMS study in subjects with PTSD (e.g., neuroimaging, neuropsychology, neurophysiology, neurochemistry) | 2         |
| Treatment of PTSD with another neuromodulation technique (e.g., deep transcranial magnetic stimulation)               | 1         |
| Study in subjects with other psychiatric disorders (e.g., bipolar disorder)                                           | 1         |
| Study in subjects with neurological/urological/orthopedic diseases                                                    | 49        |
| Studies in healthy subjects                                                                                           | 8         |
| Studies in non-humans or using human cells                                                                            | 9         |
| <b>TOTAL</b>                                                                                                          | <b>93</b> |

**Table 2.** MEDLINE, PsycINFO, EMBASE, CENTRAL, and SCOPUS: reasons for exclusion – RCTs on rTMS for PTSD.

| Reference                 | Reason for Exclusion (example)                                         |
|---------------------------|------------------------------------------------------------------------|
|                           | 2010                                                                   |
| Levine et al <sup>1</sup> | n = 7, but ongoing study and no preliminary data available yet         |
|                           | 2009                                                                   |
| Osuch et al <sup>2</sup>  | n = 9, but crossover trial with only $\geq 2$ weeks between each trial |

## 2. FUNNEL PLOTS: rTMS APPLIED TO THE RIGHT DLPFC

### 2.1 Pre-Post Clinician-Reported PTSD Symptoms

Funnel Plot of Standard Error by Hedges's g

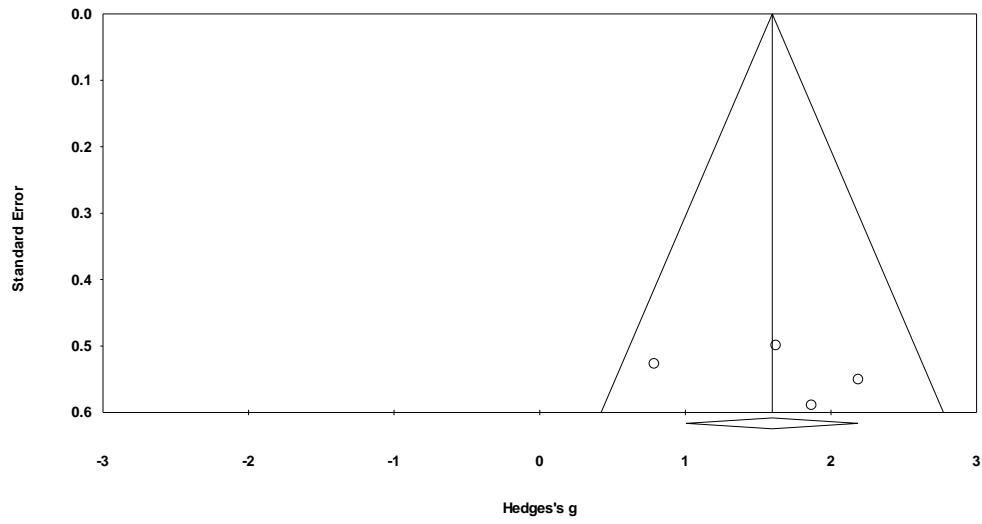

**2.2 Pre-Post Self-Reported PTSD Symptoms**

Funnel Plot of Standard Error by Hedges's g

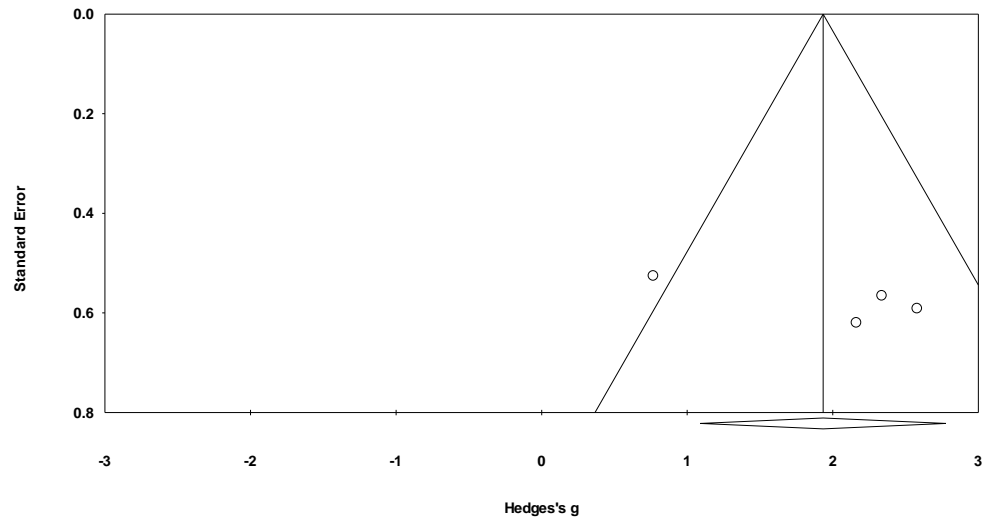

**2.3 Pre-Post Overall Anxiety Symptoms**

Funnel Plot of Standard Error by Hedges's g

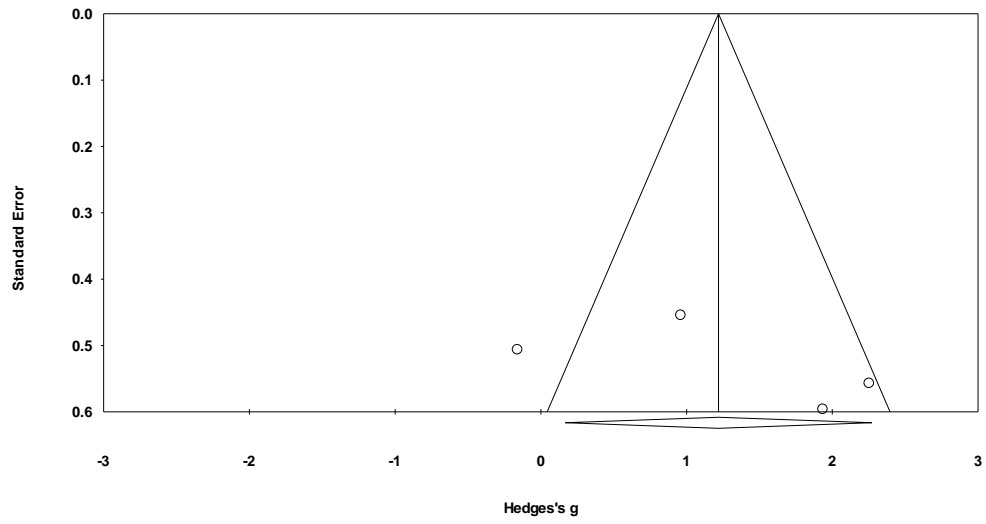

## 2.4 Pre-Post Depressive Symptoms

Funnel Plot of Standard Error by Hedges's g

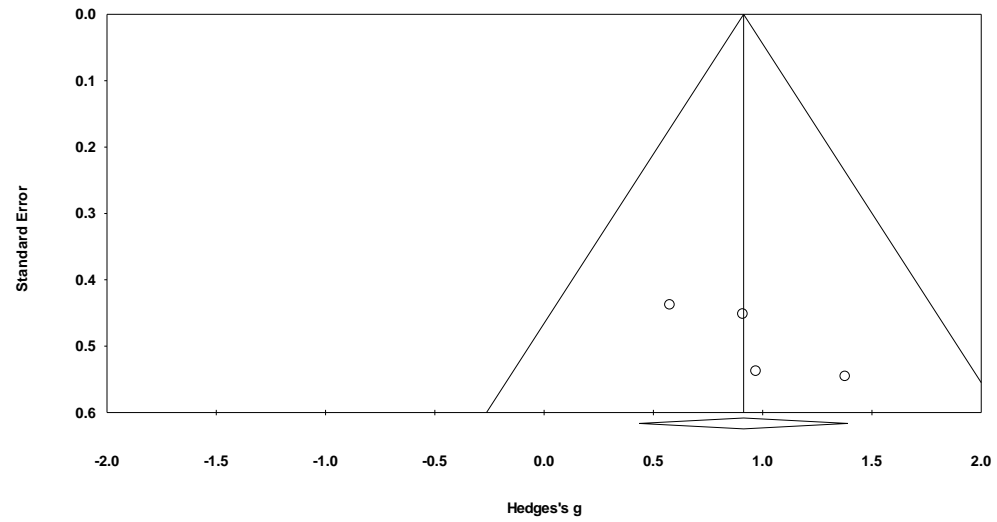

## 2.5 Dropout Rates

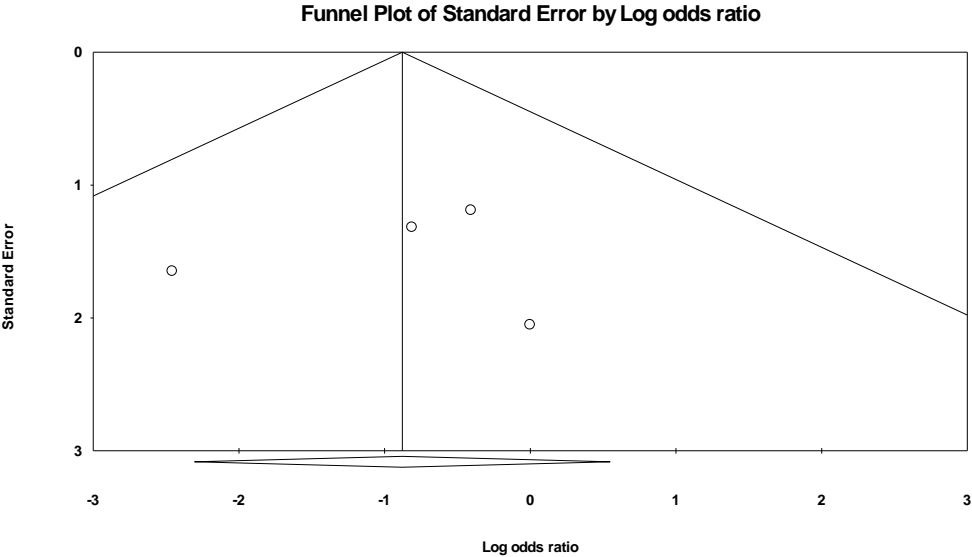

### 3. FOREST PLOTS: RTMS APPLIED TO THE RIGHT DLPFC

#### 3.1 Baseline Clinician-Reported PTSD Symptoms

| Studyname          | Statistics for each study |                |          |             |             |         |         | Sample size |           |
|--------------------|---------------------------|----------------|----------|-------------|-------------|---------|---------|-------------|-----------|
|                    | Hedges's g                | Standard error | Variance | Lower limit | Upper limit | Z-Value | p-Value | Active rTMS | Sham rTMS |
| Cohen et al, 2004a | 1.013                     | 0.541          | 0.292    | -0.047      | 2.072       | 1.873   | 0.061   | 8           | 6         |
| Cohen et al, 2004b | 0.592                     | 0.499          | 0.249    | -0.387      | 1.570       | 1.185   | 0.236   | 10          | 6         |
| Boggio et al, 2010 | 0.544                     | 0.437          | 0.191    | -0.312      | 1.400       | 1.245   | 0.213   | 10          | 10        |
| Watts et al, 2012  | 0.815                     | 0.447          | 0.200    | -0.062      | 1.691       | 1.821   | 0.069   | 10          | 10        |
|                    | 0.722                     | 0.238          | 0.057    | 0.256       | 1.188       | 3.036   | 0.002   | 38          | 32        |

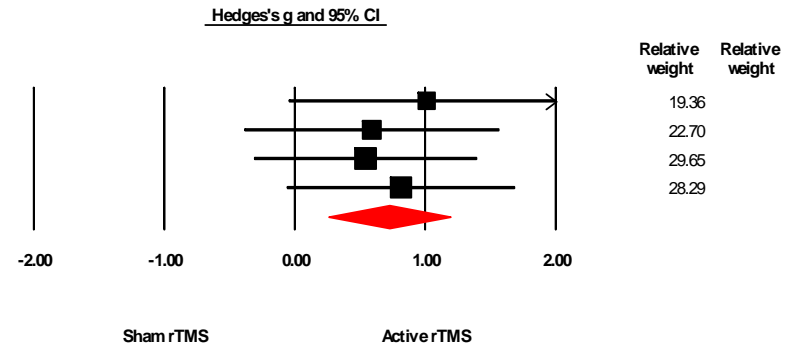

#### 3.2 Baseline Patient-Reported PTSD Symptoms

| Study name         | Statistics for each study |                |          |             |             |         |         | Sample size |           |
|--------------------|---------------------------|----------------|----------|-------------|-------------|---------|---------|-------------|-----------|
|                    | Hedges's g                | Standard error | Variance | Lower limit | Upper limit | Z-Value | p-Value | Active rTMS | Sham rTMS |
| Cohen et al, 2004a | 0.834                     | 0.530          | 0.280    | -0.204      | 1.873       | 1.576   | 0.115   | 8           | 6         |
| Cohen et al, 2004b | 0.564                     | 0.498          | 0.248    | -0.412      | 1.541       | 1.133   | 0.257   | 10          | 6         |
| Boggio et al, 2010 | 0.368                     | 0.432          | 0.187    | -0.480      | 1.215       | 0.851   | 0.395   | 10          | 10        |
| Watts et al, 2012  | 1.376                     | 0.480          | 0.231    | 0.435       | 2.318       | 2.865   | 0.004   | 10          | 10        |
|                    | 0.763                     | 0.241          | 0.058    | 0.291       | 1.234       | 3.171   | 0.002   | 38          | 32        |

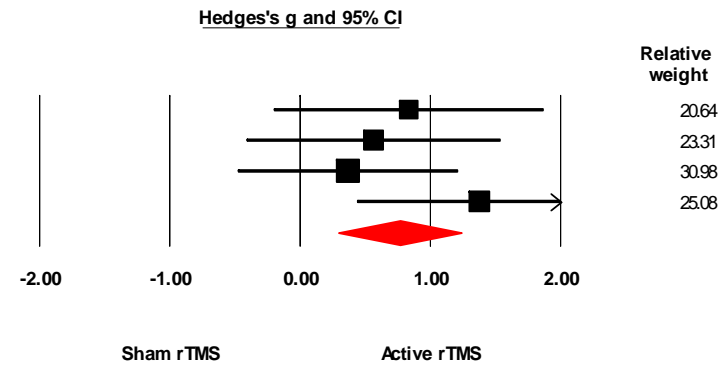

#### 3.3 Baseline Overall Anxiety Symptoms

| Study name         | Statistics for each study |                |          |             |             |         |         | Sample size |           |
|--------------------|---------------------------|----------------|----------|-------------|-------------|---------|---------|-------------|-----------|
|                    | Hedges's g                | Standard error | Variance | Lower limit | Upper limit | Z-Value | p-Value | Active rTMS | Sham rTMS |
| Cohen et al, 2004a | 0.017                     | 0.506          | 0.256    | -0.974      | 1.008       | 0.034   | 0.973   | 8           | 6         |
| Cohen et al, 2004b | 0.409                     | 0.494          | 0.244    | -0.559      | 1.376       | 0.828   | 0.408   | 10          | 6         |
| Boggio et al, 2010 | 0.490                     | 0.435          | 0.189    | -0.364      | 1.343       | 1.125   | 0.261   | 10          | 10        |
| Watts et al, 2012  | 0.304                     | 0.431          | 0.186    | -0.541      | 1.148       | 0.704   | 0.481   | 10          | 10        |
|                    | 0.319                     | 0.231          | 0.054    | -0.134      | 0.773       | 1.380   | 0.168   | 38          | 32        |

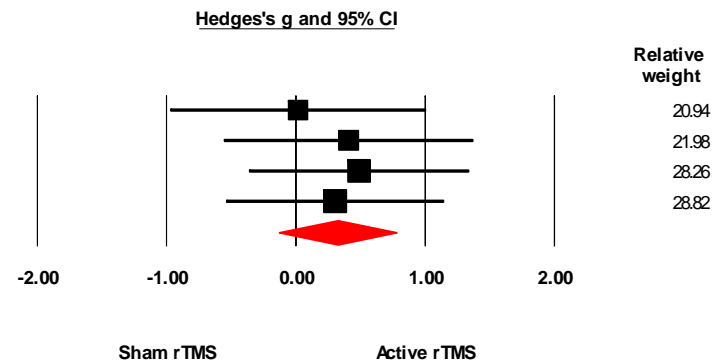

### 3.4 Baseline Depressive Symptoms

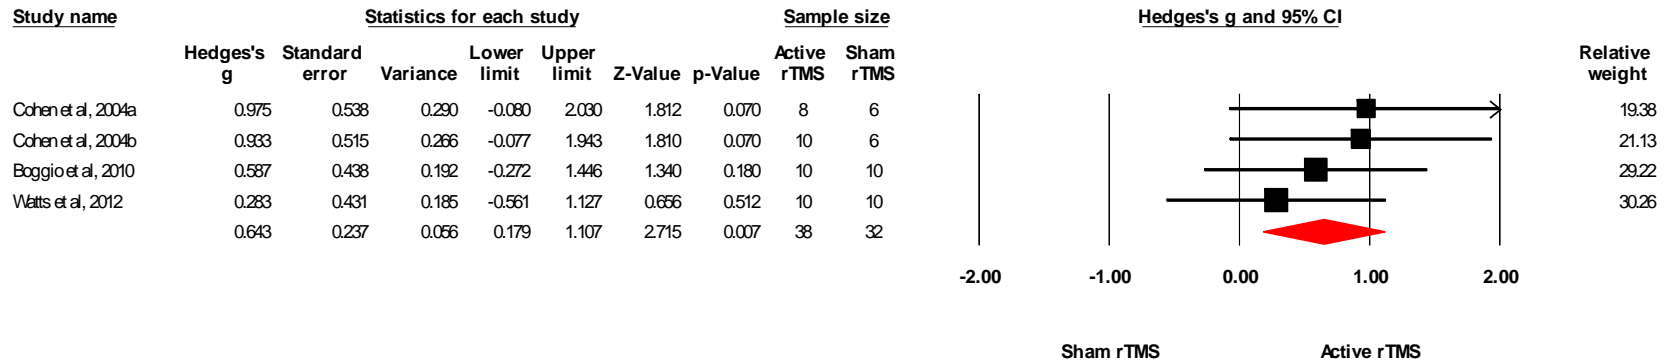

### 3.5 Subgroup Analysis - HF-rTMS vs. LF-rTMS: Pre-Post Clinician-Reported PTSD Symptoms

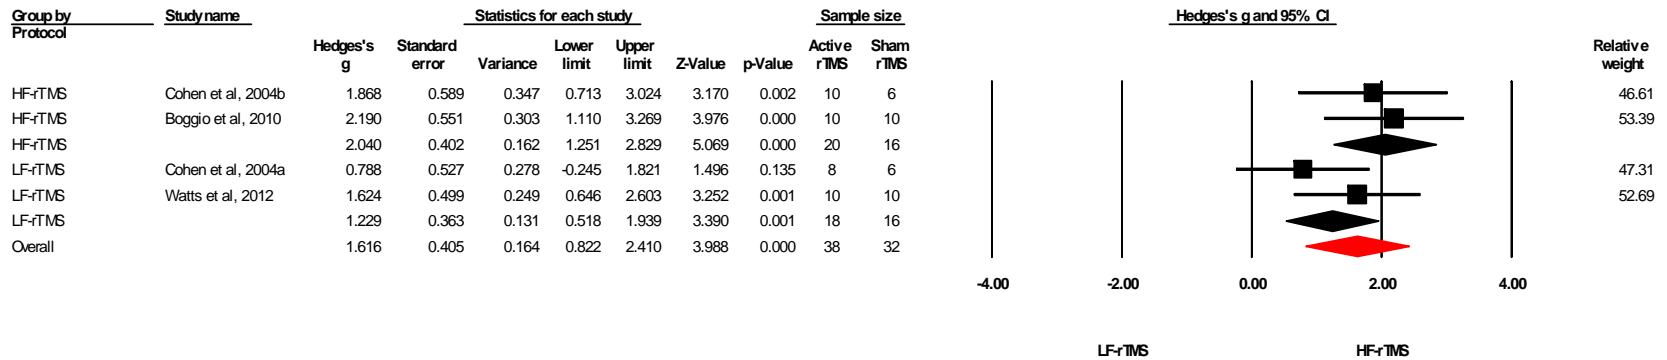

### 3.6 Subgroup Analysis - HF-rTMS vs. LF-rTMS: Pre-Post Patient-Reported PTSD Symptoms

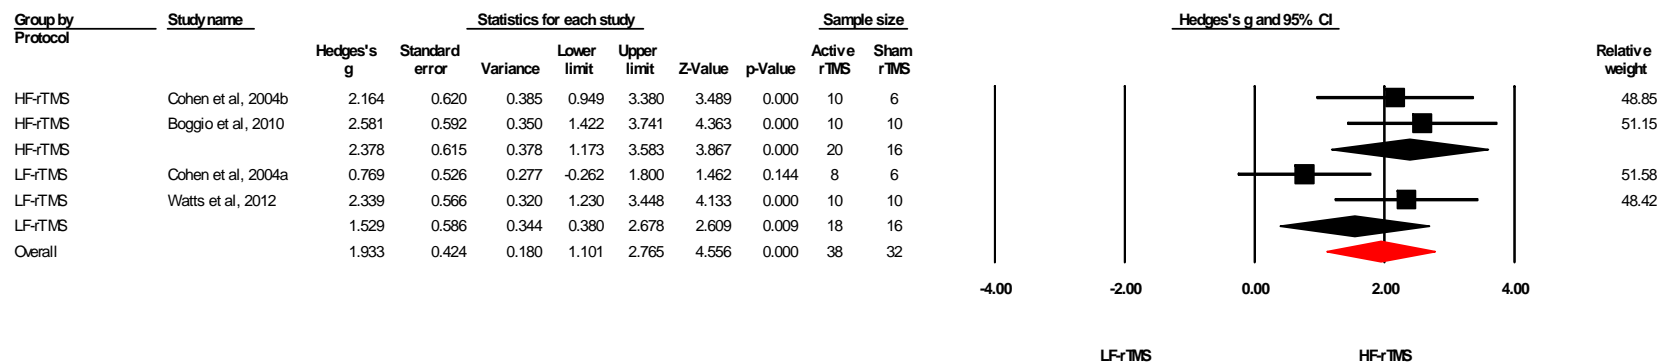

### 3.7 Subgroup Analysis - HF-rTMS vs. LF-rTMS: Pre-Post Overall Anxiety Symptoms



| Group by Protocol | Study name          | Statistics for each study |                |          |             |             |         |         | Sample size |           |
|-------------------|---------------------|---------------------------|----------------|----------|-------------|-------------|---------|---------|-------------|-----------|
|                   |                     | Hedges's g                | Standard error | Variance | Lower limit | Upper limit | Z-Value | p-Value | Active rTMS | Sham rTMS |
| HF-rTMS           | Cohen et al., 2004b | 1.936                     | 0.596          | 0.356    | 0.768       | 3.105       | 3.247   | 0.001   | 10          | 6         |
| HF-rTMS           | Boggio et al., 2010 | 2.255                     | 0.557          | 0.311    | 1.162       | 3.347       | 4.046   | 0.000   | 10          | 10        |
| HF-rTMS           |                     | 2.103                     | 0.474          | 0.225    | 1.174       | 3.033       | 4.436   | 0.000   | 20          | 16        |
| LF-rTMS           | Cohen et al., 2004a | -0.159                    | 0.506          | 0.257    | -1.151      | 0.834       | -0.314  | 0.754   | 8           | 6         |
| LF-rTMS           | Watts et al., 2012  | 0.961                     | 0.454          | 0.207    | 0.071       | 1.852       | 2.115   | 0.034   | 10          | 10        |
| LF-rTMS           |                     | 0.441                     | 0.417          | 0.174    | -0.376      | 1.258       | 1.059   | 0.290   | 18          | 16        |
| Overall           |                     | 1.257                     | 0.831          | 0.690    | -0.371      | 2.885       | 1.513   | 0.130   | 38          | 32        |

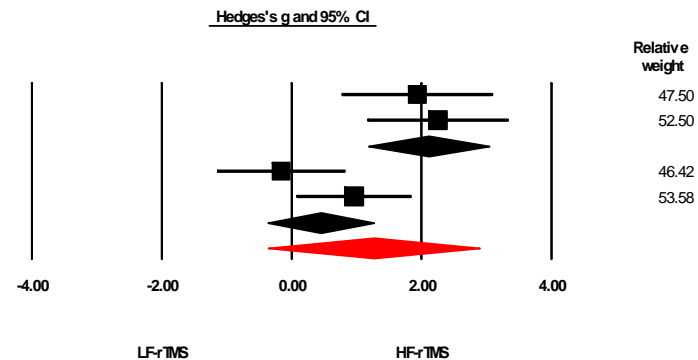

### 3.8 Subgroup Analysis - HF-rTMS vs. LF-rTMS: Pre-Post Depressive Symptoms

| Group by Protocol | Study name          | Statistics for each study |                |          |             |             |         |         | Sample size |           |
|-------------------|---------------------|---------------------------|----------------|----------|-------------|-------------|---------|---------|-------------|-----------|
|                   |                     | Hedges's g                | Standard error | Variance | Lower limit | Upper limit | Z-Value | p-Value | Active rTMS | Sham rTMS |
| HF-rTMS           | Cohen et al., 2004b | 1.378                     | 0.546          | 0.298    | 0.309       | 2.448       | 2.526   | 0.012   | 10          | 6         |
| HF-rTMS           | Boggio et al., 2010 | 0.576                     | 0.438          | 0.192    | -0.282      | 1.435       | 1.316   | 0.188   | 10          | 10        |
| HF-rTMS           |                     | 0.891                     | 0.342          | 0.117    | 0.221       | 1.560       | 2.608   | 0.009   | 20          | 16        |
| LF-rTMS           | Cohen et al., 2004a | 0.970                     | 0.538          | 0.289    | -0.084      | 2.024       | 1.804   | 0.071   | 8           | 6         |
| LF-rTMS           | Watts et al., 2012  | 0.910                     | 0.452          | 0.204    | 0.025       | 1.796       | 2.014   | 0.044   | 10          | 10        |
| LF-rTMS           |                     | 0.935                     | 0.346          | 0.120    | 0.257       | 1.613       | 2.703   | 0.007   | 18          | 16        |
| Overall           |                     | 0.913                     | 0.243          | 0.059    | 0.436       | 1.389       | 3.755   | 0.000   | 38          | 32        |

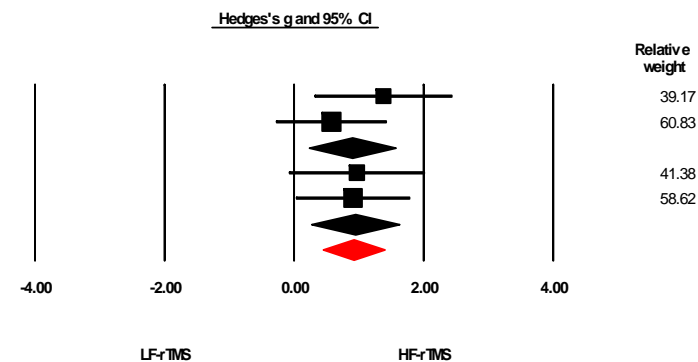

## 4. REFERENCES

1. Levine J, Gauchman T, Grisaru N. High frequency TMS effect over right versus left prefrontal cortex, each with or without exposure to traumatic stimuli on PTSD flashbacks. *Int J Neuropsychopharmacol.* 2010;13:210.
2. Osuch EA, Benson BE, Luckenbaugh DA, Geraci M, Post RM, McCann U. Repetitive TMS combined with exposure therapy for PTSD: a preliminary study. *J Anxiety Disord.* 2009;23:54-9.
